# Supplementary material for: Analysis of Staphylococcus aureus wall teichoic acid glycoepitopes by Fourier Transform Infrared Spectroscopy provides novel insights into the staphylococcal glycocode
Source: PubMed Central journal article supplement (PMC5789974; doi:10.1038/s41598-018-20222-6), 2018-01-30
Supplement: 41598_2018_20222_MOESM1_ESM.pdf [file 41598_2018_20222_MOESM1_ESM.pdf]

## Supplementary Information

### **Analysis of *Staphylococcus aureus* wall teichoic acid glycoepitopes by Fourier Transform Infrared Spectroscopy provides novel insights into the staphylococcal glyocode**

Tom Grunert<sup>a,\*</sup>, Dijana Jovanovic<sup>a</sup>, Wanchat Sirisarn<sup>b</sup>, Sophia Johler<sup>c</sup>, Christopher Weidenmaier<sup>d</sup>, Monika Ehling-Schulz<sup>a</sup>, Guoqing Xia<sup>b</sup>

<sup>a</sup>Functional Microbiology, Institute of Microbiology, Department of Pathobiology, University of Veterinary Medicine Vienna, Vienna, Austria.

<sup>b</sup>Division of Infection, Immunity and Respiratory Medicine, School of Biological Sciences Faculty of Biology, Medicine and Health, Manchester Academic Health Science Centre , University of Manchester, Manchester, M13 9PT, United Kingdom.

<sup>c</sup>Institute for Food Safety and Hygiene, Vetsuisse Faculty University of Zurich, Zurich, Switzerland.

<sup>d</sup>Interfaculty Institute for Microbiology and Infection Medicine Tübingen, University of Tübingen and German Center for Infection Research, Tübingen, Germany.

# Supplementary Fig. S1

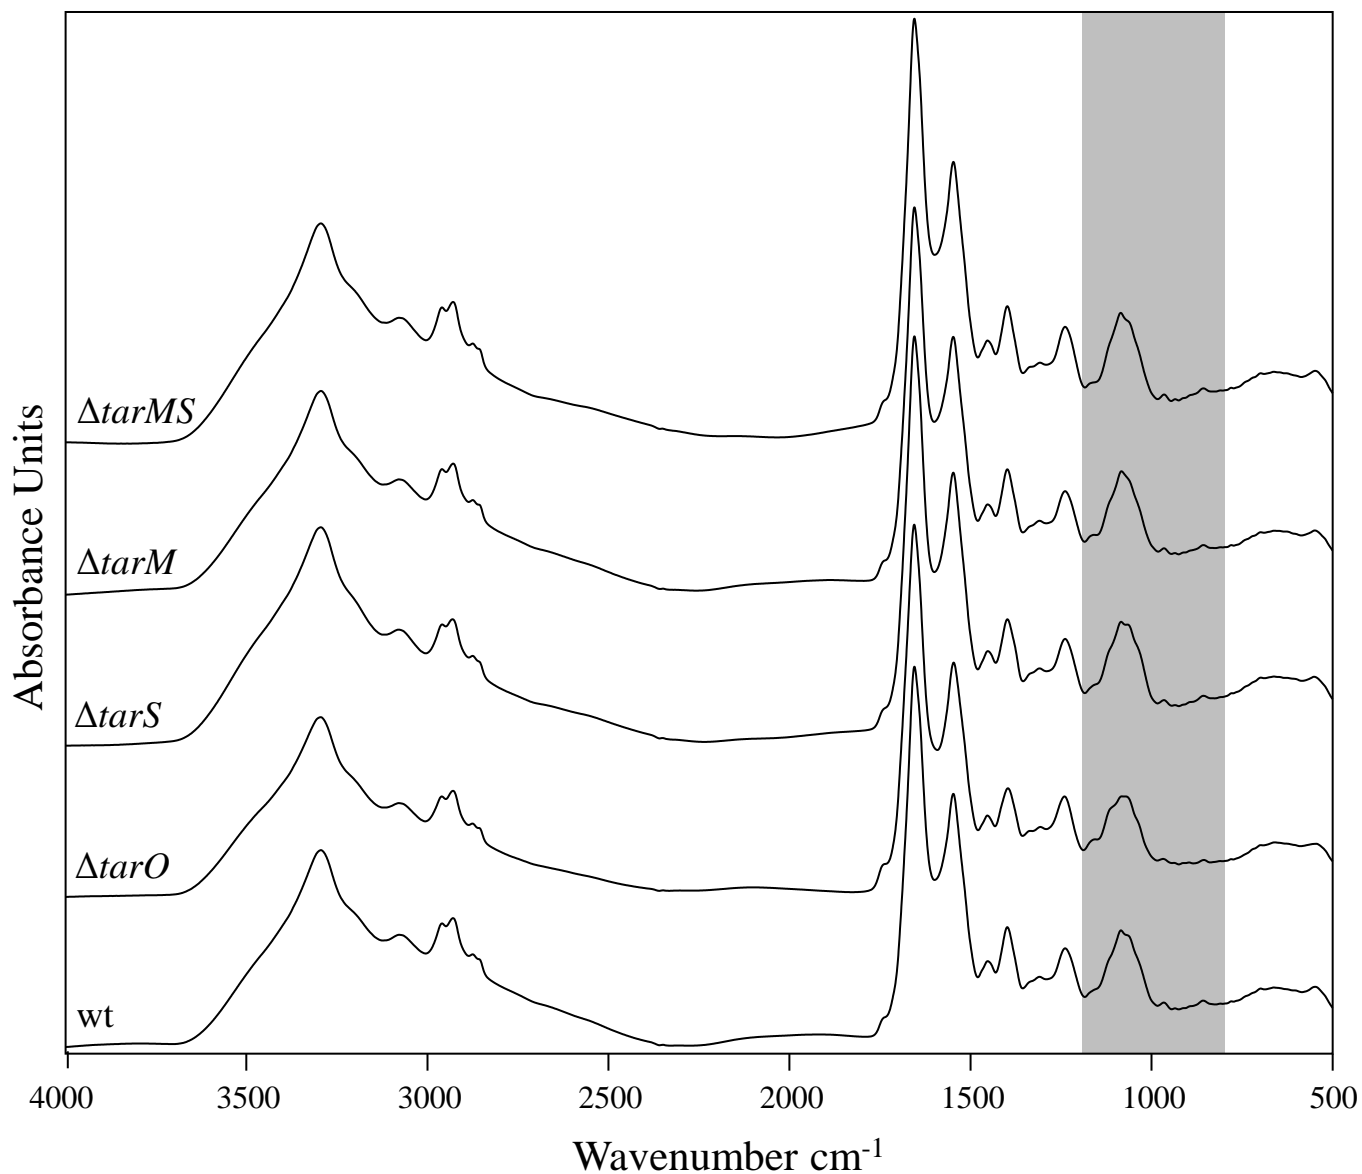

Representative original absorbance spectra over the whole spectral range (4000-500 $\text{cm}^{-1}$ ) derived from intact bacterial cells of strain RN4220 and their corresponding mutants ( $\Delta tarO$ ,  $\Delta tarS$ ,  $\Delta tarM$  and  $\Delta tarMS$ ). The spectral range between 1200-800 $\text{cm}^{-1}$  (highlighted in gray), also referred as polysaccharide region, was used for further spectral and chemometric analysis.

# Supplementary Fig. S2

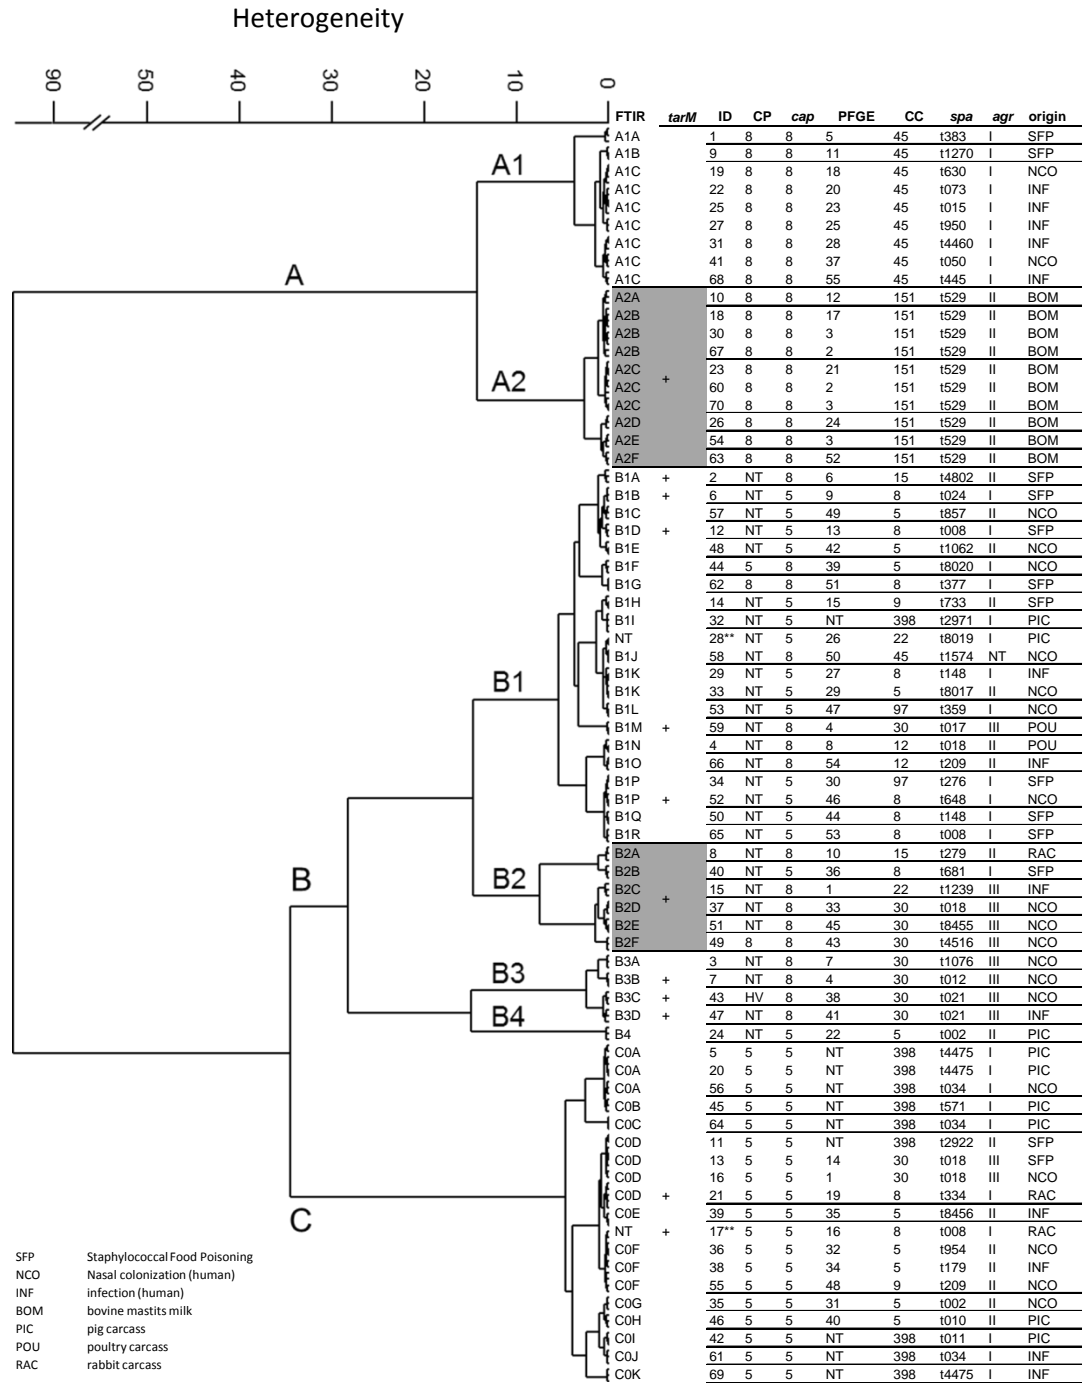

Correlation between the presence of the *tarM* gene and the strain specific signal signature of WTA  $\alpha$ -O-GlcNAc analysed by HCA-FTIR spectroscopy using a diverse strain set of 70 isolates. It can be assumed that the presence of  $\alpha$ -O-GlcNAc WTA may additionally contribute to the discrimination of *S. aureus* strains by FTIR spectroscopy, which is primarily based on CP expression (Cluster A: CP8; cluster B: NT; cluster C: CP8).

HCA was adapted from: Johler, S., Stephan, R., Althaus, D., Ehling-Schulz, M. & Grunert, T. High-resolution subtyping of *Staphylococcus aureus* strains by means of Fourier-transform infrared spectroscopy. *Syst. Appl. Microbiol.*, doi:10.1016/j.syapm.2016.03.003 (2016).
